# Supplementary material for: A hierarchical flower-like hollow alumina supported bimetallic AuPd nanoparticle catalyst for enhanced solvent-free ethylbenzene oxidation
Source: Royal Society of Chemistry journal article supplement (doi:10.1039/c8dt01182f), 2018-01-01
Supplement: c8dt01182f1.pdf [file c8dt01182f1.pdf]

## Supporting Information

### **Hierarchical flower-like hollow alumina supported bimetallic AuPd nanoparticle catalyst for the enhanced solvent-free ethylbenzene oxidation**

*Huijuan Dong, Renfeng Xie, Lan Yang, Feng Li\**

*State Key Laboratory of Chemical Resource Engineering, Beijing Advanced Innovation Center for Soft Matter Science and Engineering, Beijing University of Chemical Technology, Beijing, 100029, P.R. China*

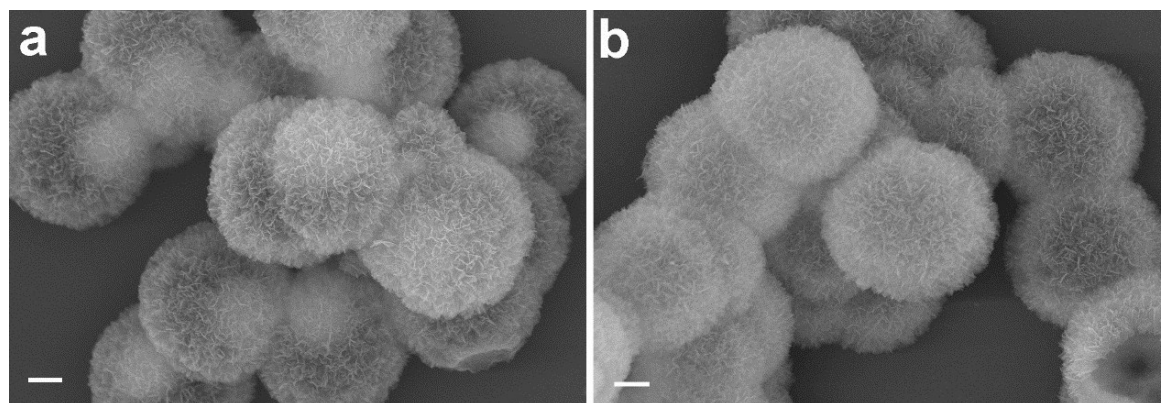

**Fig.S1** SEM images of Au/MHAM (a) and Pd/MHAM (b) samples. The bar scale is 1.0  $\mu$  m.

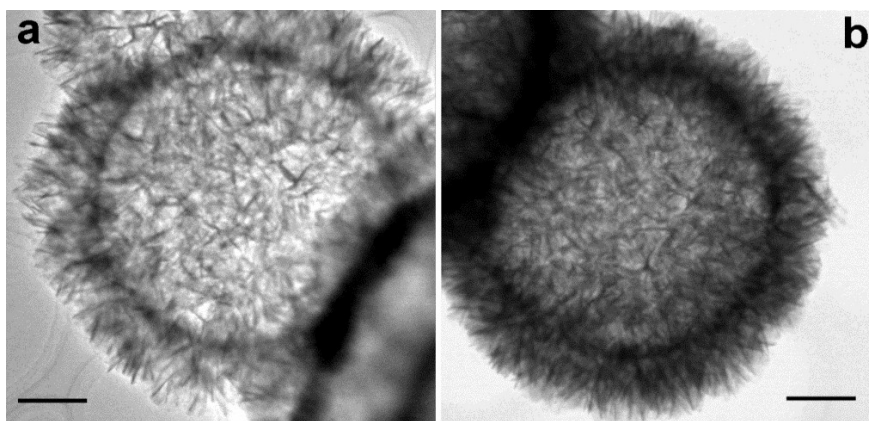

**Fig.S2** TEM images of Au/MHAM(a) and Pd/MHAM(b) samples. The bar scale is 1.0  $\mu$  m.

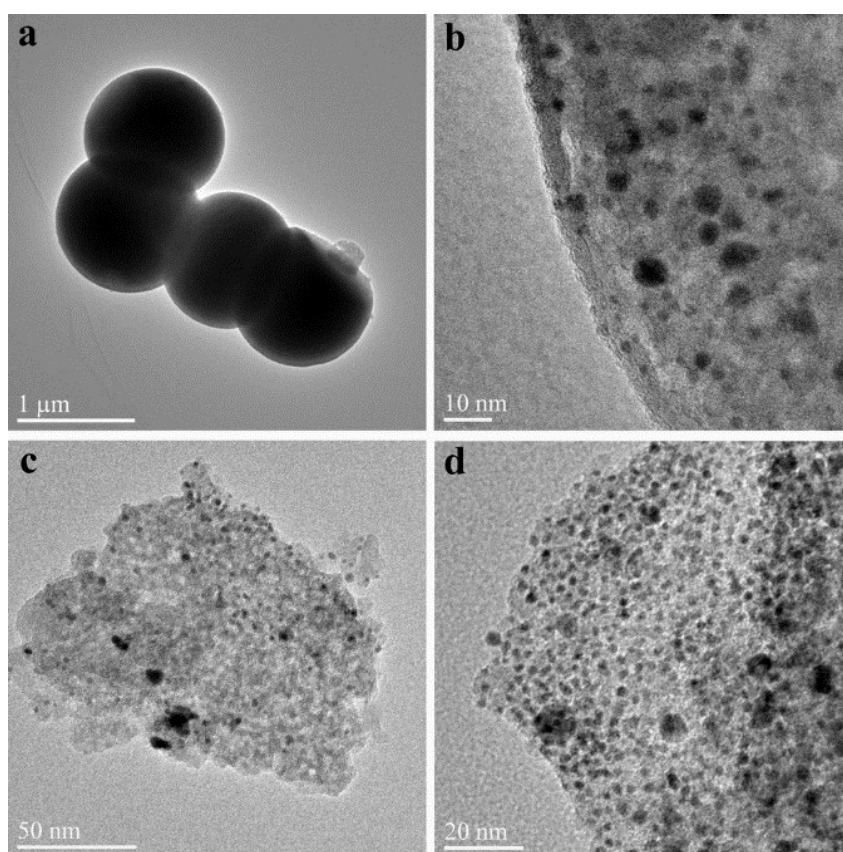

**Fig.S3** TEM and HRTEM images of AuPd/S-Al<sub>2</sub>O<sub>3</sub> (a and b) and AuPd/C-Al<sub>2</sub>O<sub>3</sub> (c and d).

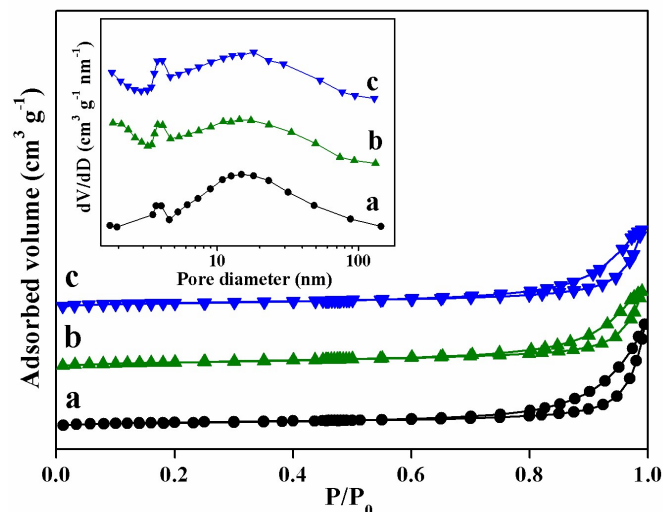

**Fig.S4** Low-temperature N<sub>2</sub> adsorption-desorption isotherms of Au/MHAM (a), AuPd/MHAM (b) and Pd/MHAM (c) samples. The inset shows the pore size distributions of samples.

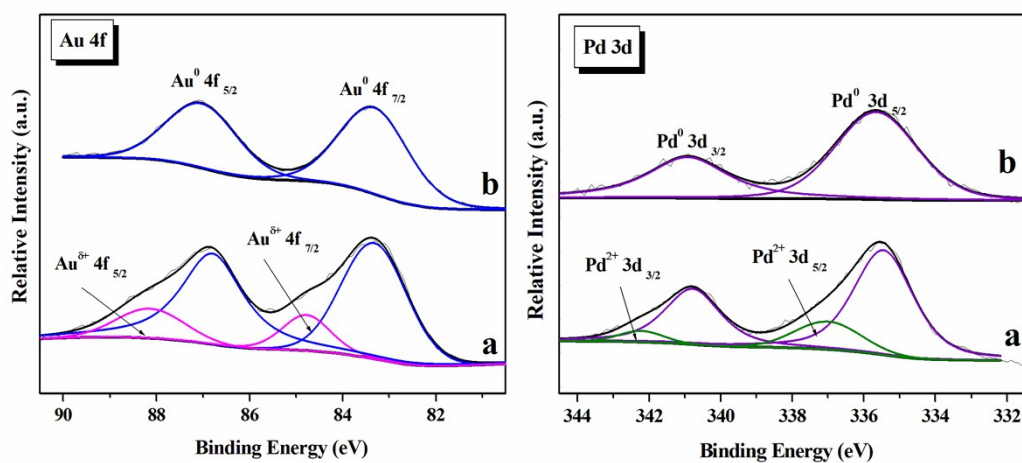

**Fig.S5** XPS of Au 4f and Pd 3d regions for AuPd/S-Al<sub>2</sub>O<sub>3</sub> (a) and AuPd/C-Al<sub>2</sub>O<sub>3</sub> (b) samples.

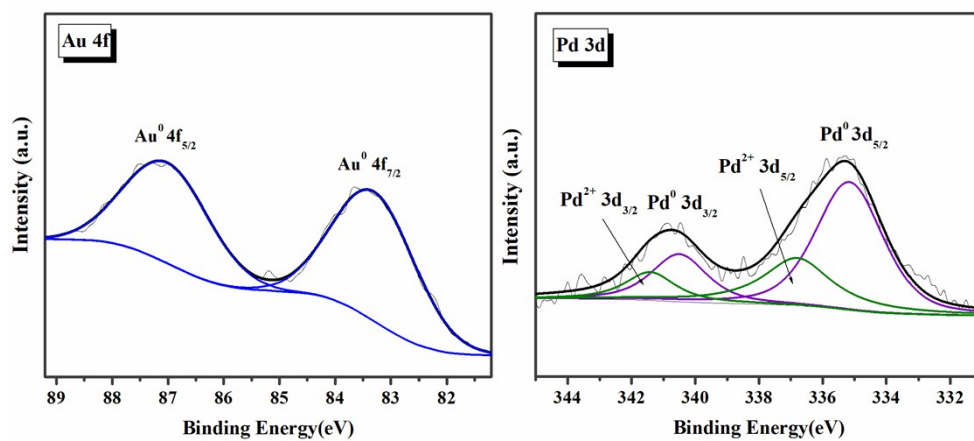

**Fig.S6** XPS of Au 4f and Pd 3d regions for AuPd/MHAM sample pre-treated at 200 °C at air for 30 min.

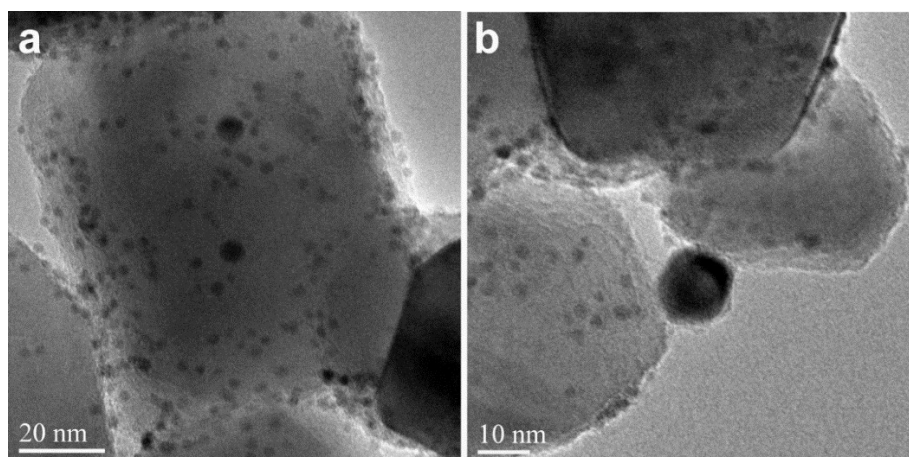

**Fig.S7** TEM images of AuPd/TiO<sub>2</sub> sample (a and b).

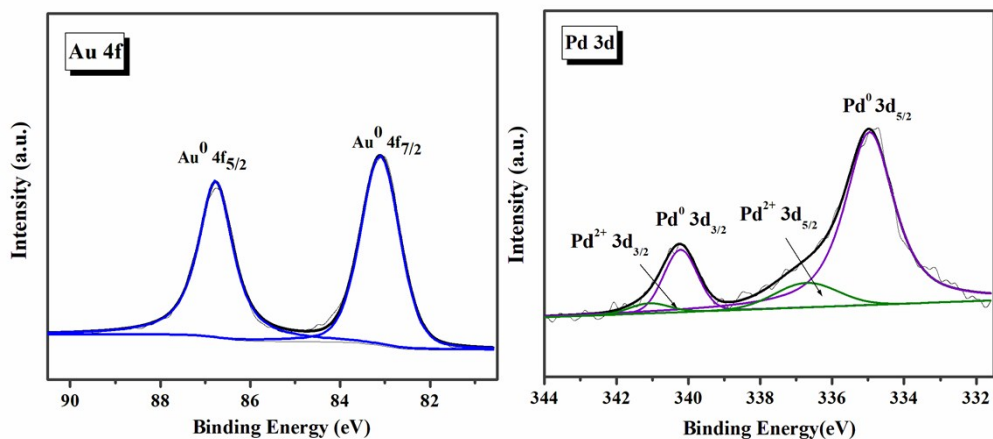

**Fig.S8** XPS of Au 4f and Pd 3d regions for AuPd/TiO<sub>2</sub> sample.

**Table S1** Catalytic performances of other catalysts in the EB oxidation.

| Catalyst                                                        | Time (h) | Temp. (°C) | P <sub>O2</sub> (MPa) | solvent            | Conv. (%) | Selec.to AP (%) | TON (mol/mol) | Ref.      |
|-----------------------------------------------------------------|----------|------------|-----------------------|--------------------|-----------|-----------------|---------------|-----------|
| Au/TiO <sub>2</sub>                                             | 24       | 90         | 1.0 atm               | ---                | 26.0      | 85.0            | 910           | [28]      |
| Au-Pd/MIL-101                                                   | 4        | 150        | 1.5                   | CH <sub>3</sub> CN | 38.5      | 65.3            | 3850          | [41]      |
| Ce <sub>0.5</sub> Mn <sub>0.5</sub> O <sub>x</sub> <sup>a</sup> | 6        | 120        | 1.0                   | CH <sub>3</sub> CN | 20.3      | 87.0            | --            | [55]      |
| Mn(OH) <sub>x</sub> /γ-Al <sub>2</sub> O <sub>3</sub>           | 9        | 135        | 5 ml/min              | BA <sup>d</sup>    | 61.0      | 84.0            | 813           | [56]      |
| MnO <sub>x</sub> /HTS <sup>b</sup>                              | 1        | 120        | 1.0                   | --                 | 37.1      | 68.6            | 137.3         | [57]      |
| Co-N-C/CeO <sub>2</sub>                                         | 5        | 120        | 0.8                   | --                 | 33.1      | 74.8            | --            | [58]      |
| Co-N-C/g-C <sub>3</sub> N <sub>4</sub>                          | 5        | 120        | 0.8                   | --                 | 28.0      | 78.1            | --            | [59]      |
| AuPd/MHAM                                                       | 12       | 120        | 1.0                   | --                 | 54.2      | 93.7            | 27433         | This work |
| AuPd/MHAM                                                       | 6        | 120        | 1.0                   | --                 | 38.1      | 85.4            | 20534         | This work |
| AuPd/MHAM                                                       | 1        | 120        | 1.0                   | --                 | 19.1      | 73.3            | 10294         | This work |

<sup>a</sup> Ce-Mn-Ox solid solution; <sup>b</sup> HTS: Hollow Titanosilicate molecular sieve TS-1; <sup>c</sup> containing TBHP (2 ml); <sup>d</sup> Benzoic acid.
